# Supplementary material for: A sandwich nanocomposite composed of commercially available SnO and reduced graphene oxide as advanced anode materials for sodium-ion full batteries
Source: Royal Society of Chemistry journal article supplement (doi:10.1039/d0qi01033b), 2020-11-18
Supplement: d0qi01033b1.pdf [file d0qi01033b1.pdf]

## Supporting Information

### **Sandwich nanocomposite composed of commercially available SnO and reduced graphene oxide as advanced anode materials for sodium-ion full batteries**

Xu Yang<sup>a</sup>, Hao-Jie Liang<sup>b</sup>, Xin-Xin Zhao<sup>a</sup>, Hai-Yue Yu<sup>a</sup>, Mei-Yi Wang<sup>a</sup>, Xue-Jiao Nie<sup>a</sup> and Xing-Long Wu<sup>\*a,b</sup>

<sup>a</sup> National & Local United Engineering Laboratory for Power Batteries, Faculty of Chemistry, Northeast Normal University, Changchun, Jilin 130024, P. R. China

<sup>b</sup> Key Laboratory for UV Light-Emitting Materials and Technology of Ministry of Education, Northeast Normal University, Changchun, Jilin 130024, P. R. China

\* The corresponding authors E-mail: xinglong@nenu.edu.cn (X.-L. Wu)

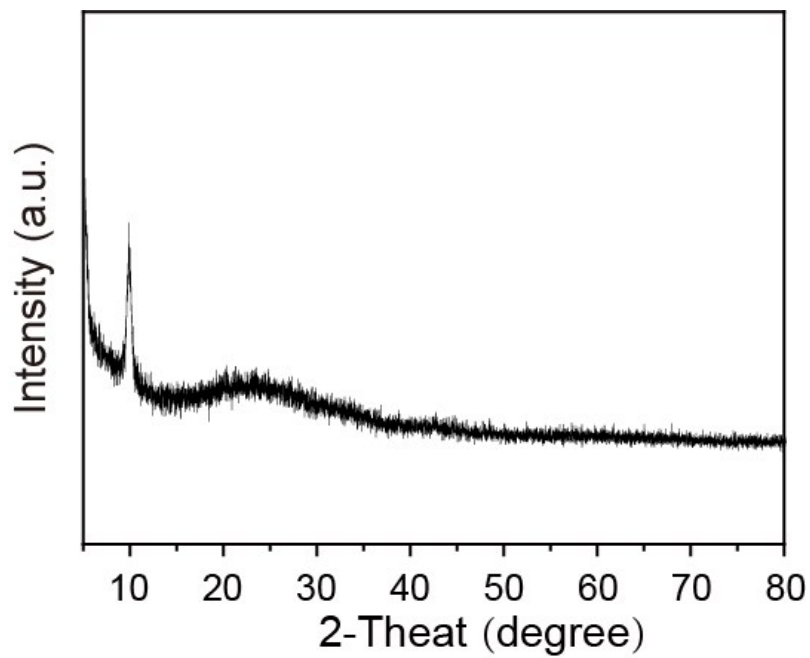

**Figure S1** XRD pattern of rGO.

The molecular formula of sample can be calculated based on the thermogravimetric analysis results (Figure S2) through the following formulations:

After the heating treatment to 800 °C, the rGO component in the sample is full lost while the SnO is oxidized into SnO<sub>2</sub>, therefore, the final product with content of 82.28% is ascribed to SnO<sub>2</sub>. Based on this, the content of rGO in the original sample can be obtained:

$$SnO\% = 82.28\% \times \frac{134.71}{150.71} = 74.08\%$$

$$rGO\% = 1 - 74.08\% = 25.92\%$$

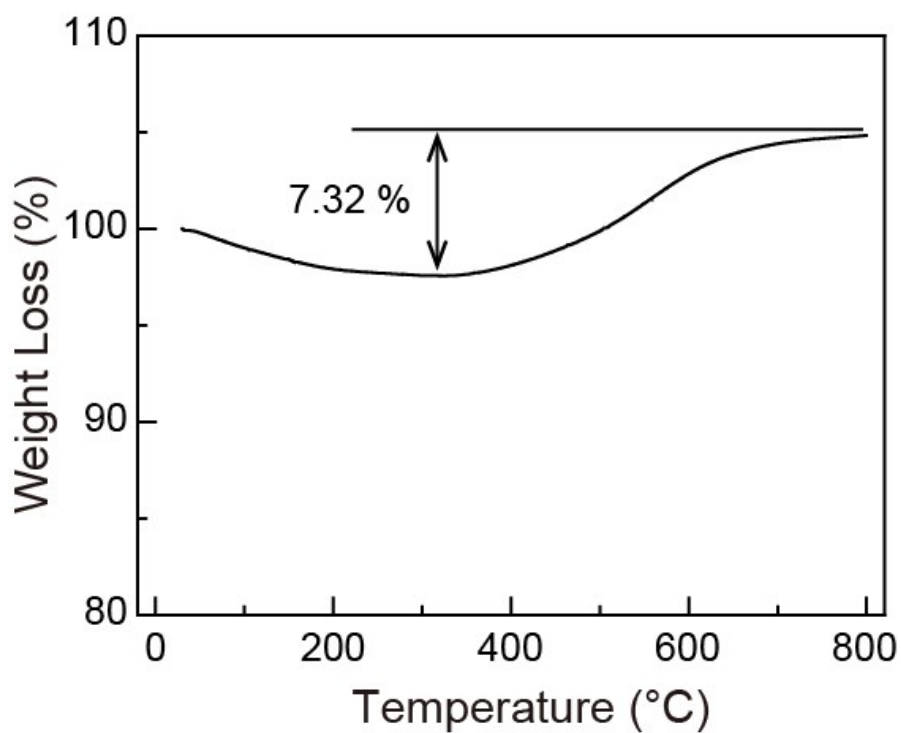

**Figure S2** The TG curve of BM-SnO.

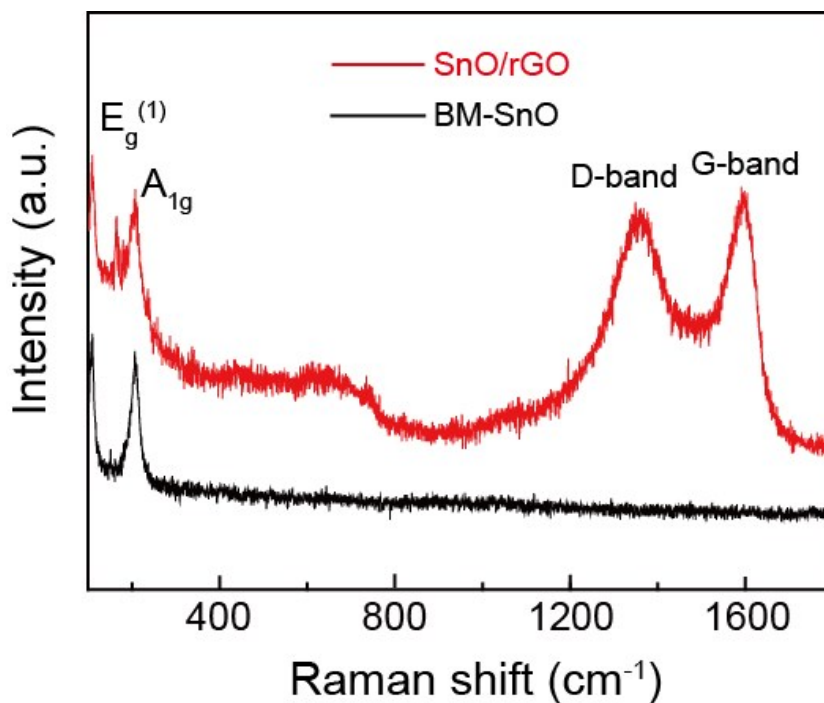

**Figure S3** Raman spectra of BM-SnO and SnO/rGO.

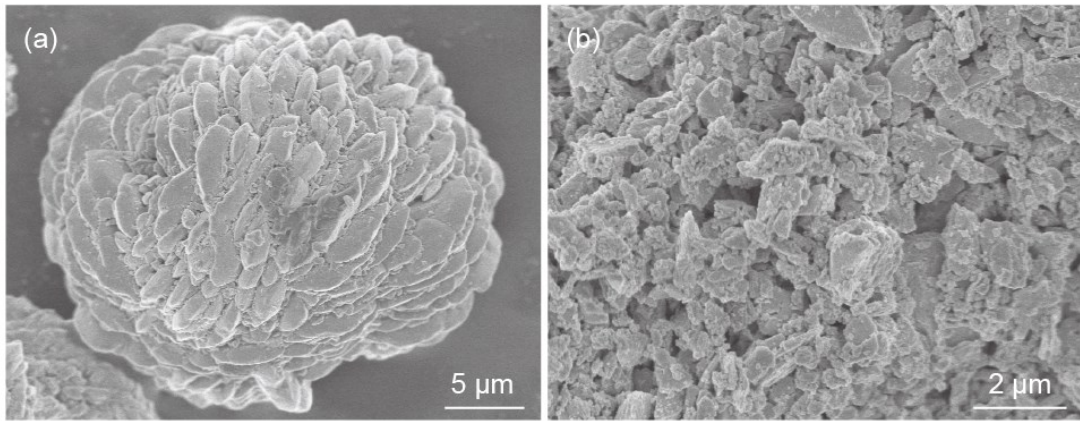

**Figure S4** SEM images of (a) SnO and (b) BM-SnO.

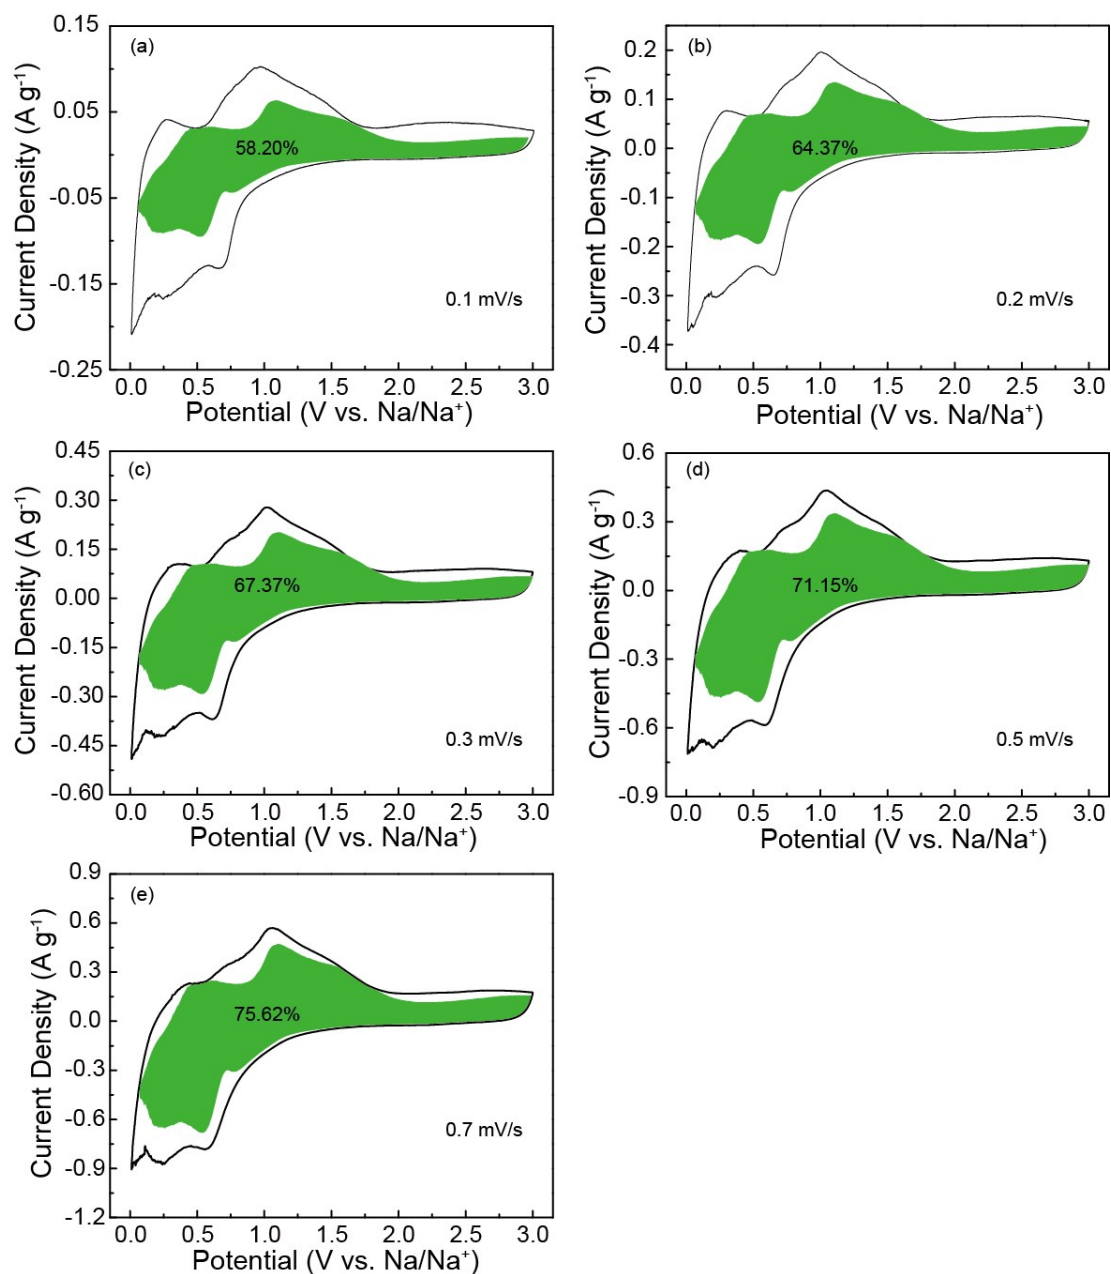

**Figure S5** CV curve with the pseudocapacitive fraction shown by the green region of SnO/rGO at a scan rate of (a) 0.1 mV s<sup>-1</sup>, (b) 0.2 mV s<sup>-1</sup>, (c) 0.3 mV s<sup>-1</sup>, (d) 0.5 mV s<sup>-1</sup> and (e) 0.7 mV s<sup>-1</sup>.

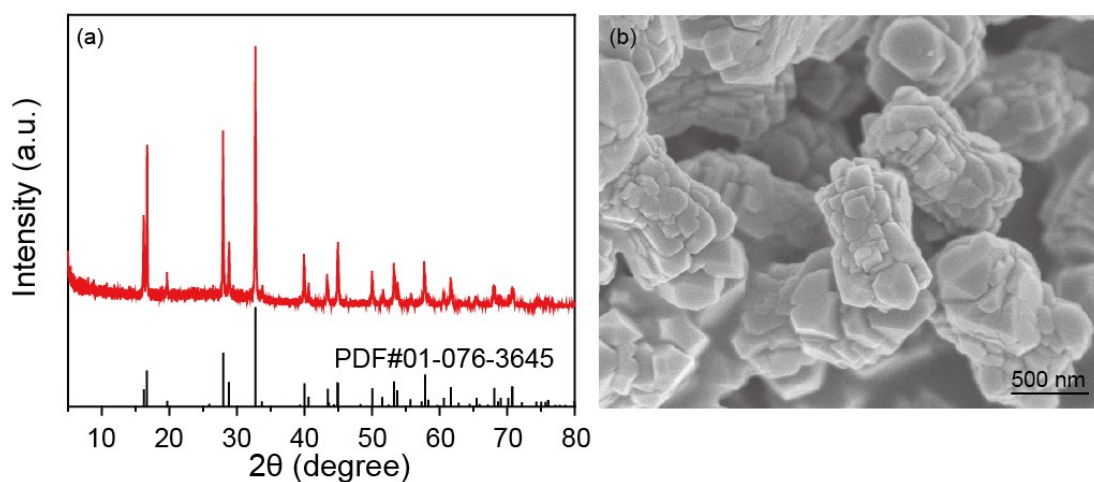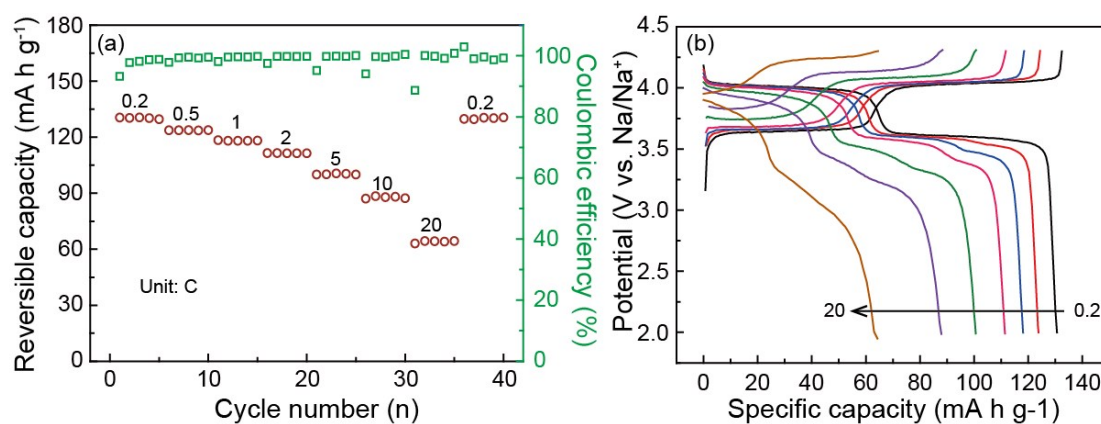

**Figure S7** the electrochemical performance of NVPOF (a) rate performance and (b) charge/discharge curves at various rates.
